# Supplementary material for: Disease-specific health spending by age, sex, and type of care in Norway: a national health registry study
Source: Springer Nature journal article supplement (doi:10.1186/s12916-023-02896-6), 2023-06-06
Supplement: MOESM1 [file 25455632]

## **Additional File1: Supplementary Appendix**

Supplements to: Kinge et al. Disease-specific health spending by age, sex, and type of care in Norway: a national health registry study

### **List of content**

#### Supplementary Methods

*Part I: International Classification of Primary Care, Second edition (ICPC-2)*

*Part II: Calculation of the cost of encounters*

*Part III: Scaling estimates to National Health Accounts*

*Part IV: The cause list*

*Part V: Addressing data gaps in the homebased care and nursing homes data*

*Part VI: Home-Based and Institutional Care in the Norwegian National Health Accounts*

#### Supplementary Tables

*Supplementary Table 1: Aggregated to disaggregated reporting level*

*Supplementary Table 2: Type of care, service unit, source of unit cost and total spending*

*Supplementary Table 3: Percent of total spending on mental disorders by age category*

*Supplementary Table 4: Total spending in the national health accounts and in the microdata, and the scalars*

#### Supplementary Figures

*Supplemental Figure 1: Mental and Substance Use Care Spending in Norway by Type of Care, 2019*

*Supplemental Figure 2: Health Care Spending per Person, adjusted for deaths in 2019, in Norway by Age, Sex, and Aggregated Condition Category, 2019*

*Supplemental Figure 3: Scatterplot and Correlation of Percent of DALYs, YLDs, YLLs and Percent of Spending in 2019*

*Supplemental Figure 4: Health Care Spending in Norway Type of Care and Age, 2019*

*Supplemental Figure 5: Top 10 Causes of Spending by Type of Care and Sex, 2019*

#### References

## Supplementary methods

### Part I: International Classification of Primary Care, Second edition (ICPC-2)

The ICPC classification was first developed in 1987 by WONCA International Classification Committee, then as HICPIC. The ICPC-2 version, which is the second revision and used in this study, was last updated in March 2003 [1]. The World Health Organization (WHO) has accepted ICPC-2 within the WHO Family of International Classifications. It is used as a classification for primary care or general practice wherever applicable.

ICPC-2 classifies patient data and clinical activity in primary care and allows classification of the patient's reason for encounter, the problems/diagnosis managed, interventions, and the ordering of these data in an episode of care structure [2].

#### *Classification Structure*

The ICPC-2 contains 17 chapters: A General and unspecified; B Blood, blood forming organs, lymphatics, spleen; D Digestive; F Eye; H Ear; K Circulatory; L Musculoskeletal; N Neurological; P Psychological; R Respiratory; S Skin; T Endocrine, metabolic and nutritional; U Urology; W Pregnancy, childbirth, family planning; X Female genital system and breast; Y Male genital system; Z Social problems. Each chapter is divided into 7 components dealing with symptoms and complaints (component 1), diagnostic, screening, and preventive procedures (component 2), medication, treatment, and procedures (component 3), test results (component 4), administrative (component 5), referrals and other reasons for encounter (component 6) and diseases (component 7).

### Part II: Calculation of the cost of encounters

The following text provide more detail on the calculation of the cost of each encounter in each data source.

#### *Hospital - somatic care*

Use of somatic hospital inpatient-, day- and outpatient care episodes were from the Norwegian Patient Register (NPR) for 2019. Costs were calculated from cost-weights using diagnosis-related groups (DRG). In Norway, all somatic hospitals electronically report patient activity to NPR. These reports include information regarding the patient's diagnoses (ICD-10 codes) and the procedures that were used to treat the patient. This information forms the basis for grouping all patient episodes into DRG's which in turn forms the basis for Activity-Based-Funding of Norwegian hospitals. In this way, each patient episode is grouped into one of approximately 900 DRGs, and each DRG holds an associated cost-weight that can be used to estimate the average cost of an inpatient, day- or outpatient care episode. The DRG-costs are designed to cover average costs of a treatment in Norway. Unit cost in 2019 for 1 DRG-point = NOK 51,796 [3].

We use the corrected DRG-points, which is adjusted in accordance with current regulations. These DRG-points does not include hospital-financed prescriptions, which are drugs prescribed by a hospital physician, dispensed at a hospital pharmacy, but consumed outside the hospital. Spending for these drugs is taken from hospital spending but is calculated separately based on a variable in the prescription drug registry that identifies the financing source. In addition, the corrected DRG-points does not include five types of bundled payments [4]. We include these bundled payments based on the uncorrected DRG-points and the prescription drug registry.

#### *Hospital – psychiatric care*

Use of psychiatric hospital inpatient-, day- and outpatient care were identified from NPR in three parts. These were mental health facilities in adults, mental health-care facilities for children and youths and specialized interdisciplinary addiction treatment. Inpatient 2019 psychiatric care was not financed through Activity Based Funding and consequently, we could not use information from DRGs' to estimate these costs. Following GM Bjørnelv, V Halsteinli, BE Kulseng, D Sonntag and RA Ødegaard [5] we use unit cost for hospital inpatient-, day- and outpatient. For inpatient stays, costs were calculated by multiplying the length of stay (in days) by and an estimate of the average cost per day. For day-care, we multiplied each day by half of the cost per day of inpatient care. All outpatient visits were multiplied by an average unit cost estimated based on the length of the consultation.

The Norwegian Directorate of Health do not estimate equal unit costs in the three types of psychiatric care (adults, children and addiction) [6]. Consequently, we apply unique unit costs in each part of the service from 2018. After inflation adjustment, these were NOK 13,110 per inpatient day and NOK 2,721 per outpatient hour, in adults. NOK 19,949 per inpatient night and 3.548 per outpatient hour, in children. NOK 8,075 per inpatient night and NOK 2,721 per outpatient hour, in addiction treatment.

#### *General practitioners*

Use of general practitioners (GPs) were identified from the Health Reimbursement Register (KUHR). This register holds information on claims from GPs and patient-copayments [7, 8]. We received information from KUHR on all claims from GP consultations/visits that occurred during 2019, the corresponding reimbursement tariff, and the out-of-pocket payment paid per visit. Following, GM Bjørnelv, V Halsteinli, BE Kulseng, D Sonntag and RA Ødegaard [5] and The Norwegian Directorate of Health [9] we therefore divided the claim and patient-copayment by 0.5 to estimate total costs of care, before scaling to the Norwegian Health Accounts.

#### *Physiotherapist and chiropractors*

Use of Physiotherapist and chiropractors were identified from KUHR in the same manner as for primary care physicians.

#### *Private specialist on contract*

Use of private specialists on contract (publicly funded) were identified from KUHR in the same manner as for primary care physicians.

#### *Long-term care*

Use of long-term care services were identified from the individual-based statistics for nursing and care services (IPLOS) registry. The registry contains information on services provided in LTC, also services classified as social services. The only part of home-based services classified as health services is the type "15 [Health services at home] [10]. Included in institutional LTC are the type of services: "8 [Alleviation - in institution], "17 [Day care in institution]", "22 [Overnight stay in institution]", "21 [Long term stay in institution]", "25 [Municipal emergency help in institution]", "18, 19 & 20 [Time-limited stay]". We do not use a unit cost from an external source, for this part of the service. Instead the unit cost were calculated by dividing total spending from the National Health on 1) the total number of hours in 2019 of face-to-face patient oriented time received for each episode of home-based care, and 2) the total patient time at institution in 2019 for each episode of inpatient LTC.

#### *Prescription drugs*

Prescription drugs were identified from the Norwegian Prescription Database (NorPD), which contains a complete listing of all prescription drugs dispensed by Norwegian pharmacies to noninstitutionalized

individuals. The register also contains the pharmacy retail price, which were multiplied with the number of dispensed prescriptions.

### **Part III: Scaling estimates to National Health Accounts**

Spending estimates derived from microdata were scaled to official estimates of yearly health spending published in the National Health Accounts by Statistics Norway. This scaling took place at the aggregated level, for each age, sex, health condition and type of care, in 2019.

Age-, sex-, condition-, and type-specific spending estimates were summed by year and type of care to create yearly spending totals that parallel the National Health Accounts. These totals were then divided by the corresponding National Health Accounts envelopes to generate type of care specific scalars for 2019:

$$Scalar_{TypeOfCare} = \frac{Unscaled\ spending_{TypeOfCare}}{National\ Health\ Accounts\ Envelope_{TypeOfCare}}$$

The scalars used for each type of care are shown in Supplementary Table 4. The scalars with a value below 1 reflect that parts of the expenditures are not included in our prices. Health personnel outside of hospital are paid by a mix of fee-for-service, user charges and capitation. Often the capitation is not included in our microdata. For outpatient treatments, the deductibles are also not included. In addition, laboratory services and radiology, external non-funded services, and capital costs are not included in somatic specialist care microdata. Following the cost-of-illness methodology in prior Norwegian studies, we assume that these expenditures can be distributed in accordance with the explained spending [5, 11-15].

For psychiatric day-care, we multiplied each day by half of the cost per day of psychiatric inpatient care. We observe that the scalar was larger than one, thus this method overestimated the spending, which was then corrected down by scaling the spending.

### **Part IV: The Cause List**

The cause list for this project was based on the Disease Expenditure (DEX) project at the Institute for Health Metrics and Evaluation [11]. Their cause list is in turn based on the Global Burden of Disease Study 2017. GBD 2017 classified causes of health loss at five different levels of disaggregation. The DEX project extracted the Level III classification from GBD 2017. This resulted in a list of 140 causes based on GBD alone. An additional 14 causes were added to the DEX project to account for 4 risk factors and 10 health conditions associated with spending, even if not accounted for by the burden focused GBD project: hypertension, hyperlipidemia, obesity, and tobacco cessation. In addition to these, 10 causes were added that were not associated with health loss but were associated with health spending. Examples of these 10 additional causes were routine health check-ups and uncomplicated labor and delivery, heart failure, septicemia, and renal failure. Spending on these “causes” was tracked because they represent large portions of health spending and are of political interest. A detailed list and map of all causes is in Supplementary Table 1.

### **Part V: Addressing data gaps in the homebased care and nursing homes data**

The homebased care and nursing home information required adjustments for two reasons. First, the dataset did not provide information to identify primary diagnosis, in cases where multiple diagnoses per encounter were listed. Second, some home-based and of nursing home records had missing diagnosis,

which were imputed based on records with valid diagnoses. Below we provide more detail on both adjustments.

#### Assigning primary diagnosis

Given that an encounter had at least one valid disease code, there were usually multiple diagnoses per encounter. However, the dataset did not record the primary diagnosis leaving us with little knowledge about the main reason for use of homebased care or the reason why the person was in a nursing home. For example, in some cases a diagnosis for dementia would be recorded together with less severe conditions like incontinence and/or asthma.

Following the theory used in the Norwegian Specialist Health Care Services, we wanted to assign the most severe or resource-intensive condition during the episode as the primary diagnosis. To approximate the severity of each condition we used a variable for care need, which were recorded for each patient for each episode by a nurse, using a standardized assessment form. The nurse assesses and records the level of help required for daily housework, food and goods supply, personal hygiene, dressing/undressing, toilet routines, eating, walking around the house, walking around outside, taking care of one's own health, memory, communication, daily life decisions, social activities, controlling one's own behavior, vision, hearing, and whether the applicant receives help from next of kin.[16] The care need information was available to us as a categorical variable with three categories (high, medium, and low).

We regressed the 144 disease categories as dummy variables, on the three categories for care need using an ordered logistic regression, adjusting also for age and sex. Based on each of the 144 coefficients from the ordered logistic regression, we generated a ranking of all health conditions from 1 to 144. We then applied this ranking to each episode and assigned the highest ranked condition as the primary condition. In the example above, dementia would be ranked as more severe compared with incontinence and asthma, and would thus be assigned as the primary condition. This process was conducted separately for homebased care and for nursing home care, to ensure that the ranking was specific to the type of care.

After assigning primary and secondary conditions for each episode, the comorbidity redistribution was conducted, also separately for each step. Hence, incontinence and asthma could still contribute to additional spending, for that episode, however as comorbidities.

#### Imputing missing diagnosis

To get the age sex distribution, we imputed the records with missing diagnosis, which constituted 41.4% of homebased and 24.7% of nursing home records. The records with missing diagnosis still had valid recordings of age, sex, and type of care. In cases where a disease code was completely missing, we replaced the missing health condition with a random draw of observed values from a donor-pool of encounters, which were similar with respect to age, sex, and type of care.

### **Part VI: Home-Based and Institutional Care in the Norwegian National Health Accounts**

The separation between health and social care has been a challenge in the context of long-term care (LTC) in the health accounts [17]. In theory, the Norwegian Health Accounts should include only health care. In the following, we explain how this has been identified.

In Norway, since 2002, functionally distributed figures from the Municipality-State-Reporting system KOSTRA have been used to indicate the level of total spending for LTC (home-based care and inpatient)

[18, 19]. These figures do not provide a basis for distinguishing health-related from non-health-related services. Therefore, for institutional LTC, figures for places in nursing and retirement homes are used. The proportion of nursing home places is used to distinguish the health-related part of institutional spending, which should be included in the health accounts. In addition to long-term care in institutions, home-based LTC also needs separate out social care from health care. Statistics Norway uses individual-based statistics for nursing and care services (IPLoS) registry to distinguish between health-related and non-health-related care in the home. The proportion of home health services (which includes both somatic and psychiatric care) is used to identify the health-related part of the home-based care expenses, which are included in the Norwegian national health accounts [18, 20].

## Supplementary Tables

**Supplementary Table 1: Aggregated to disaggregated reporting level**

| Aggregate conditions (DEX level 2)                         | Disaggregated conditions (DEX level 3)                              |
|------------------------------------------------------------|---------------------------------------------------------------------|
| Communicable, maternal, neonatal, and nutritional diseases | Tuberculosis                                                        |
| Communicable, maternal, neonatal, and nutritional diseases | HIV/AIDS                                                            |
| Communicable, maternal, neonatal, and nutritional diseases | Diarrheal diseases                                                  |
| Communicable, maternal, neonatal, and nutritional diseases | Tetanus                                                             |
| Communicable, maternal, neonatal, and nutritional diseases | Measles                                                             |
| Communicable, maternal, neonatal, and nutritional diseases | Varicella                                                           |
| Communicable, maternal, neonatal, and nutritional diseases | Intestinal infectious diseases                                      |
| Communicable, maternal, neonatal, and nutritional diseases | Lower respiratory tract infections                                  |
| Communicable, maternal, neonatal, and nutritional diseases | Upper respiratory tract infections                                  |
| Communicable, maternal, neonatal, and nutritional diseases | Otitis media                                                        |
| Communicable, maternal, neonatal, and nutritional diseases | Meningitis                                                          |
| Communicable, maternal, neonatal, and nutritional diseases | Encephalitis                                                        |
| Communicable, maternal, neonatal, and nutritional diseases | Diphtheria                                                          |
| Communicable, maternal, neonatal, and nutritional diseases | Whooping cough                                                      |
| Communicable, maternal, neonatal, and nutritional diseases | Neglected tropical diseases and malaria                             |
| Communicable, maternal, neonatal, and nutritional diseases | Maternal hemorrhage                                                 |
| Communicable, maternal, neonatal, and nutritional diseases | Maternal sepsis and other pregnancy related infection               |
| Communicable, maternal, neonatal, and nutritional diseases | Hypertensive disorders of pregnancy                                 |
| Communicable, maternal, neonatal, and nutritional diseases | Obstructed labor                                                    |
| Communicable, maternal, neonatal, and nutritional diseases | Complications of abortion                                           |
| Communicable, maternal, neonatal, and nutritional diseases | Pre-existing medical condition complicating pregnancy or childbirth |
| Communicable, maternal, neonatal, and nutritional diseases | Other maternal disorders                                            |
| Communicable, maternal, neonatal, and nutritional diseases | Preterm birth complications                                         |
| Communicable, maternal, neonatal, and nutritional diseases | Neonatal encephalopathy (birth asphyxia and birth trauma)           |
| Communicable, maternal, neonatal, and nutritional diseases | Sepsis and other infectious disorders of the newborn baby           |
| Communicable, maternal, neonatal, and nutritional diseases | Hemolytic disease in fetus and newborn and other neonatal jaundice  |
| Communicable, maternal, neonatal, and nutritional diseases | Other neonatal disorders                                            |
| Communicable, maternal, neonatal, and nutritional diseases | Protein-energy malnutrition                                         |
| Communicable, maternal, neonatal, and nutritional diseases | Iodine deficiency                                                   |
| Communicable, maternal, neonatal, and nutritional diseases | Vitamin A deficiency                                                |
| Communicable, maternal, neonatal, and nutritional diseases | Iron-deficiency anemia                                              |
| Communicable, maternal, neonatal, and nutritional diseases | Other nutritional deficiencies                                      |
| Communicable, maternal, neonatal, and nutritional diseases | Sexually transmitted diseases excluding HIV                         |
| Communicable, maternal, neonatal, and nutritional diseases | Hepatitis                                                           |
| Communicable, maternal, neonatal, and nutritional diseases | Leprosy                                                             |
| Communicable, maternal, neonatal, and nutritional diseases | Other infectious diseases                                           |
| Communicable, maternal, neonatal, and nutritional diseases | Septicemia                                                          |
| Neoplasms                                                  | Esophageal cancer                                                   |
| Neoplasms                                                  | Colon and rectum cancers                                            |
| Neoplasms                                                  | Mouth cancer                                                        |
| Neoplasms                                                  | Nasopharynx cancer                                                  |
| Neoplasms                                                  | Other pharynx cancer                                                |
| Neoplasms                                                  | Gallbladder and biliary tract cancer                                |
| Neoplasms                                                  | Pancreatic cancer                                                   |
| Neoplasms                                                  | Malignant skin melanoma                                             |
| Neoplasms                                                  | Non-melanoma skin cancer                                            |
| Neoplasms                                                  | Ovarian cancer                                                      |
| Neoplasms                                                  | Testicular cancer                                                   |
| Neoplasms                                                  | Stomach cancer                                                      |
| Neoplasms                                                  | Kidney cancer                                                       |
| Neoplasms                                                  | Bladder cancer                                                      |
| Neoplasms                                                  | Brain and nervous system cancers                                    |
| Neoplasms                                                  | Thyroid cancer                                                      |

|                                    |                                                     |
|------------------------------------|-----------------------------------------------------|
| Neoplasms                          | Hodgkin lymphoma                                    |
| Neoplasms                          | Non-Hodgkin lymphoma                                |
| Neoplasms                          | Multiple myeloma                                    |
| Neoplasms                          | Leukemia                                            |
| Neoplasms                          | Other neoplasms                                     |
| Neoplasms                          | Liver cancer                                        |
| Neoplasms                          | Larynx cancer                                       |
| Neoplasms                          | Trachea, bronchus, and lung cancers                 |
| Neoplasms                          | Breast cancer                                       |
| Neoplasms                          | Cervical cancer                                     |
| Neoplasms                          | Uterine cancer                                      |
| Neoplasms                          | Prostate cancer                                     |
| Other non-communicable diseases    | Congenital anomalies                                |
| Other non-communicable diseases    | Skin and subcutaneous diseases                      |
| Other non-communicable diseases    | Sense organ diseases                                |
| Other non-communicable diseases    | Oral disorders                                      |
| Cardiovascular diseases            | Rheumatic heart disease                             |
| Cardiovascular diseases            | Other cardiovascular and circulatory diseases       |
| Cardiovascular diseases            | Heart failure                                       |
| Cardiovascular diseases            | Ischemic heart disease                              |
| Cardiovascular diseases            | Cerebrovascular disease                             |
| Cardiovascular diseases            | Hypertensive heart disease                          |
| Cardiovascular diseases            | Cardiomyopathy and myocarditis                      |
| Cardiovascular diseases            | Atrial fibrillation and flutter                     |
| Cardiovascular diseases            | Aortic aneurysm                                     |
| Cardiovascular diseases            | Peripheral vascular disease                         |
| Cardiovascular diseases            | Endocarditis                                        |
| Chronic respiratory diseases       | Chronic obstructive pulmonary disease               |
| Chronic respiratory diseases       | Pneumoconiosis                                      |
| Chronic respiratory diseases       | Asthma                                              |
| Chronic respiratory diseases       | Interstitial lung disease and pulmonary sarcoidosis |
| Chronic respiratory diseases       | Other chronic respiratory diseases                  |
| Cirrhosis of the liver             | Cirrhosis of the liver                              |
| Digestive diseases                 | Peptic ulcer disease                                |
| Digestive diseases                 | Other digestive diseases                            |
| Digestive diseases                 | Appendicitis                                        |
| Digestive diseases                 | Paralytic ileus and intestinal obstruction          |
| Digestive diseases                 | Inguinal or femoral hernia                          |
| Digestive diseases                 | Inflammatory bowel disease                          |
| Digestive diseases                 | Vascular intestinal disorders                       |
| Digestive diseases                 | Gallbladder and biliary diseases                    |
| Digestive diseases                 | Pancreatitis                                        |
| Digestive diseases                 | Gastritis and duodenitis                            |
| Neurological disorders             | Alzheimer disease and other dementias               |
| Neurological disorders             | Parkinson's disease                                 |
| Neurological disorders             | Epilepsy                                            |
| Neurological disorders             | Multiple sclerosis                                  |
| Neurological disorders             | Migraine                                            |
| Neurological disorders             | Tension-type headache                               |
| Neurological disorders             | Other neurological disorders                        |
| Mental and substance use disorders | Schizophrenia                                       |
| Mental and substance use disorders | Conduct disorder                                    |
| Mental and substance use disorders | Idiopathic intellectual disability                  |
| Mental and substance use disorders | Other mental and behavioral disorders               |
| Mental and substance use disorders | Alcohol use disorders                               |
| Mental and substance use disorders | Drug use disorders                                  |
| Mental and substance use disorders | Depressive disorders                                |
| Mental and substance use disorders | Bipolar disorder                                    |
| Mental and substance use disorders | Anxiety disorders                                   |



|                                                     |                                                   |
|-----------------------------------------------------|---------------------------------------------------|
| Mental and substance use disorders                  | Eating disorders                                  |
| Mental and substance use disorders                  | Autistic spectrum disorders                       |
| Mental and substance use disorders                  | Attention- deficit/hyperactivity disorder         |
| Diabetes, urogenital, blood, and endocrine diseases | Diabetes mellitus                                 |
| Diabetes, urogenital, blood, and endocrine diseases | Acute glomerulonephritis                          |
| Diabetes, urogenital, blood, and endocrine diseases | Chronic kidney diseases                           |
| Diabetes, urogenital, blood, and endocrine diseases | Urinary diseases and male infertility             |
| Diabetes, urogenital, blood, and endocrine diseases | Gynecological diseases                            |
| Diabetes, urogenital, blood, and endocrine diseases | Hemoglobinopathies and hemolytic anemias          |
| Diabetes, urogenital, blood, and endocrine diseases | Endocrine, metabolic, blood, and immune disorders |
| Diabetes, urogenital, blood, and endocrine diseases | Acute renal failure                               |
| Musculoskeletal disorders                           | Rheumatoid arthritis                              |
| Musculoskeletal disorders                           | Low back and neck pain                            |
| Musculoskeletal disorders                           | Gout                                              |
| Musculoskeletal disorders                           | Osteoarthritis                                    |
| Musculoskeletal disorders                           | Other musculoskeletal disorders                   |
| Injuries                                            | Transport injuries                                |
| Injuries                                            | Falls                                             |
| Injuries                                            | Other unintentional injuries                      |
| Injuries                                            | Self-harm and interpersonal violence              |
| Well care                                           | Well person                                       |
| Well care                                           | Well baby                                         |
| Well care                                           | Pregnancy and postpartum care                     |
| Well care                                           | Family planning                                   |
| Well care                                           | Donor                                             |
| Well care                                           | Counselling services                              |
| Well care                                           | Social services                                   |
| Risk factors                                        | Tobacco intervention                              |
| Risk factors                                        | Treatment of obesity                              |
| Risk factors                                        | Treatment of hypertension                         |
| Risk factors                                        | Treatment of hyperlipidemia                       |

Note: The DEX-cause list is described in more detail in Part V.

**Supplementary Table 2: Type of care, service unit, source of unit cost and total spending**

| <b>TYPE OF CARE</b>                                          | <b>SERVICE UNIT</b>     | <b>SOURCE - UNIT COST ESTIMATION</b>                                     | <b>TOTAL SPENDING BY TYPE (MILL NOK)</b> |
|--------------------------------------------------------------|-------------------------|--------------------------------------------------------------------------|------------------------------------------|
| <b>Hospital (somatic care)</b>                               |                         |                                                                          | 113 659                                  |
| Inpatient care                                               | Stays                   | DRG-weights* and national DRG unit cost (2019)                           |                                          |
| Day-care                                                     | Days                    | DRG-weights* and national DRG unit cost (2019)                           |                                          |
| Outpatient care                                              | Visits                  | DRG-weights* and national DRG unit cost (2019)                           |                                          |
| <b>Mental health hospitals</b>                               |                         |                                                                          | 33 957                                   |
| <i>Psychiatric care adults</i>                               |                         |                                                                          |                                          |
| Inpatient care                                               | Days                    | Published unit cost <sup>[6]</sup>                                       |                                          |
| Day-care                                                     | Days                    | Published unit cost <sup>[6]</sup>                                       |                                          |
| Outpatient care                                              | Visits                  | Published unit cost <sup>[6]</sup>                                       |                                          |
| <i>Mental health-care facilities for children and youths</i> |                         |                                                                          |                                          |
| Inpatient care                                               | Days                    | Published unit cost <sup>[6]</sup>                                       |                                          |
| Day-care                                                     | Days                    | Published unit cost <sup>[6]</sup>                                       |                                          |
| Outpatient care                                              | Visits                  | Published unit cost <sup>[6]</sup>                                       |                                          |
| <i>Drug and alcohol treatment</i>                            |                         |                                                                          |                                          |
| Inpatient care                                               | Days                    | Published unit cost <sup>[6]</sup>                                       |                                          |
| Outpatient care                                              | Visits                  | Published unit cost <sup>[6]</sup>                                       |                                          |
| <b>Private specialist</b>                                    |                         |                                                                          | 5 346                                    |
| Outpatient care                                              | Visits                  | Specialist tariff (based on claims) and patient co-payments              |                                          |
| <b>General practitioner</b>                                  |                         |                                                                          | 23 962                                   |
|                                                              | Contact **              | GP-tariffs (based on claims) and patient co-payments (divided by 0.5 **) |                                          |
| <b>Physiotherapist and chiropractors</b>                     |                         |                                                                          | 4 870                                    |
|                                                              | Contact                 | Tariffs based on claims and patient co-payment                           |                                          |
| <b>Long-term care</b>                                        |                         |                                                                          |                                          |
| Inpatient (nursing homes)                                    | Days                    | 61 396/total number of days                                              | 61 396                                   |
| Home based care                                              | Hours                   | 53 138/total number of hours                                             | 53 138                                   |
| <b>Prescription drugs</b>                                    |                         |                                                                          | 18 978                                   |
|                                                              | Prescriptions dispensed | Pharmacy retail price                                                    |                                          |

Note: all cost are scaled to match the National Health Accounts as the envelope.[13]

\* DRG-weights vary depending on the resources required for a treatment belonging to a specific DRG-category. Unit cost in 2019 for 1 DRG-point = NOK 51,796 EURO 5 257.[3]

\*\* Following, GM Bjørnelv, V Halsteinli, BE Kulseng, D Sonntag and RA Ødegaard [5] and The Norwegian Directorate of Health [9] we therefore divided the claim and patient-copayment by 0.5 to estimate total costs of care, before scaling to the Norwegian Health Accounts.

**Supplementary Table 3: Percent of total spending on mental and substance use disorders by age category**

|                 | Total        | Males        | Females      |
|-----------------|--------------|--------------|--------------|
| Age<1           | 1.41         | 1.69         | 1.08         |
| Aged 1-14       | 36.29        | 38.46        | 33.35        |
| Aged 15-49      | 45.97        | 52.41        | 40.70        |
| Aged 50-74      | 15.36        | 14.81        | 15.93        |
| Aged 75 & above | 3.03         | 2.70         | 3.23         |
| <i>All ages</i> | <i>20.64</i> | <i>23.30</i> | <i>18.47</i> |

**Supplementary Table 4: Total spending in the national health accounts and in the microdata, and the scalars**

|                                           | National Health Accounts | Sum of spending from microdata | Scalars |
|-------------------------------------------|--------------------------|--------------------------------|---------|
| <b>GPs*</b>                               | 23.96                    | 19.95                          | 0.83    |
| <b>Physio. Chiro.</b>                     | 4.62                     | 2.52                           | 0.55    |
| <b>Specialists outside hospital</b>       | 5.35                     | 3.87                           | 0.72    |
| <b>Psychiatric Specialized outpatient</b> | 11.43                    | 9.88                           | 0.86    |
| <b>Psychiatric Day patient</b>            | 0.14                     | 0.18                           | 1.27    |
| <b>Psychiatric Inpatient</b>              | 22.39                    | 20.60                          | 0.92    |
| <b>Somatic Day patient</b>                | 6.41                     | 5.73                           | 0.89    |
| <b>Somatic Specialized outpatient</b>     | 22.67                    | 16.93                          | 0.66    |
| <b>Somatic Inpatient</b>                  | 79.04                    | 57.15                          | 0.72    |
| <b>Prescription drugs</b>                 | 18.98                    | 14.63                          | 0.77    |
| <b>Home-based LTC**</b>                   | 53.14                    | 53.14                          | 1       |
| <b>Institutional LTC***</b>               | 60.68                    | 60.68                          | 1       |

\* the sum of microdata spending reflects the claim and patient-copayment divided by 0.5

\*\* the unit cost were generated by dividing the total spending on home-based LTC on the total number of hours of face-to-face time of care received at home.

\*\*\* the unit cost were generated by dividing the total spending on Institutional LTC on the total number of hours spent in institution.

The hospital-financed prescriptions are also added to the somatic specialist care services.

## Supplementary Figures

**Supplemental Figure 1: Mental and Substance Use Care Spending in Norway by Type of Care, 2019**

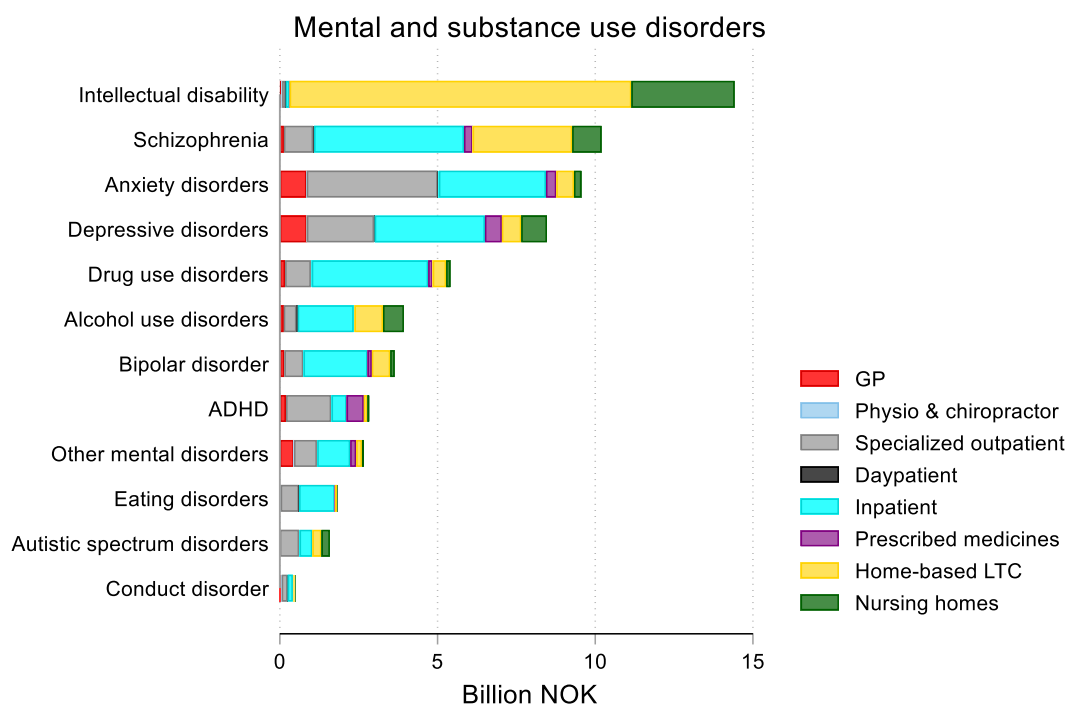

**Supplemental Figure 2: Health Care Spending per Person, adjusted for deaths in 2019, in Norway by Age, Sex, and Aggregated Condition Category, 2019**

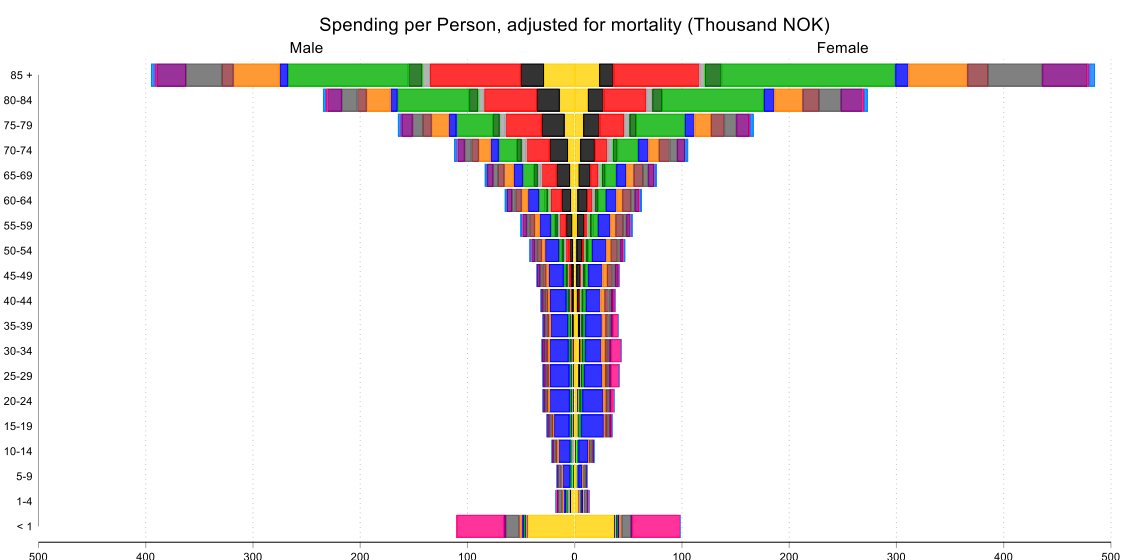

\* Communicable, maternal, neonatal, and nutritional diseases

\*\* DUBE indicates diabetes, urogenital, blood, and endocrine diseases.

Reported in 2019 Norwegian Kroner. Panel A illustrates health care spending by age, sex, and aggregated condition category. Panel B illustrates health care spending per person. Supplementary table 3 lists the aggregated condition category in which each condition was classified. Increases in spending along the x-axis show more spending. Population by age and sex is from Statistics Norway and is the 1 of

January 2019. Some persons die during the year, we assume that these live for six months and thus subtract “deaths\*0.5” by age and sex from the population count.

### Supplemental Figure 3: Scatterplot and Correlation of Percent of DALYs, YLDs, YLLs and Percent of Spending in 2019

#### A: Spending and DALYs

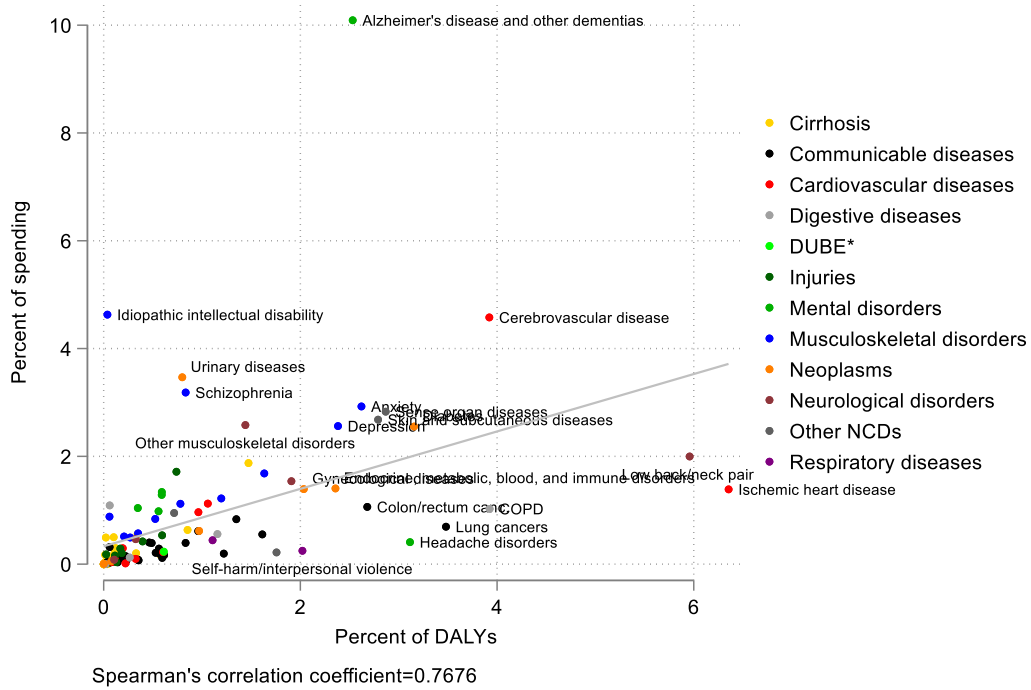

#### B: Spending and YLDs

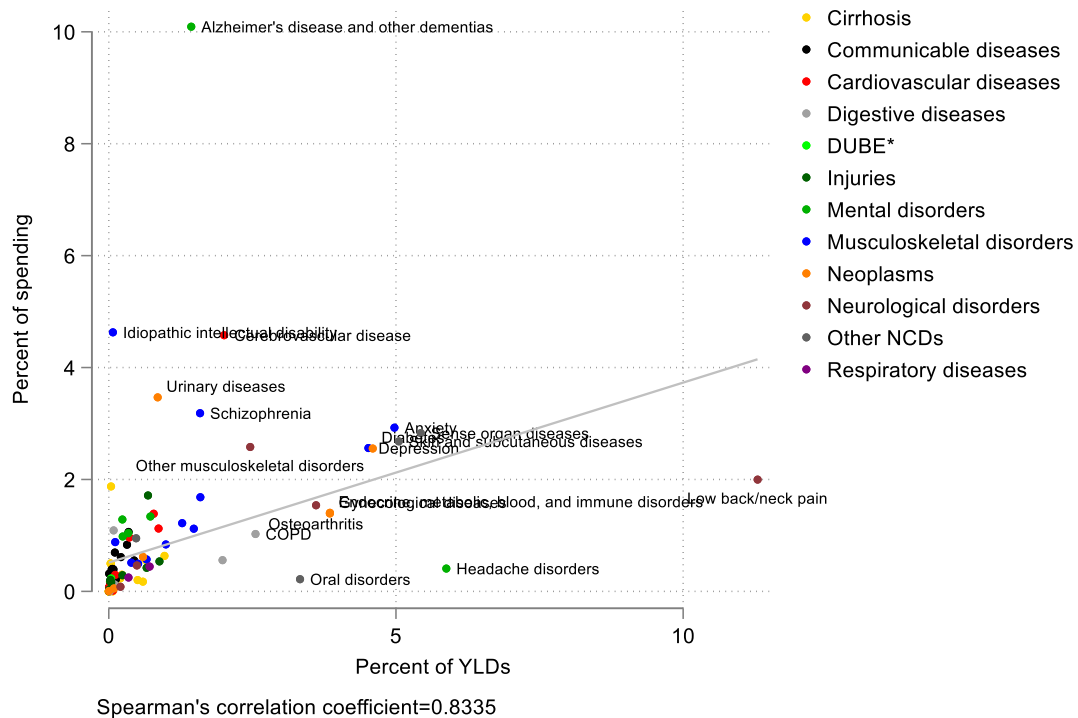

### C: Spending and YLLs

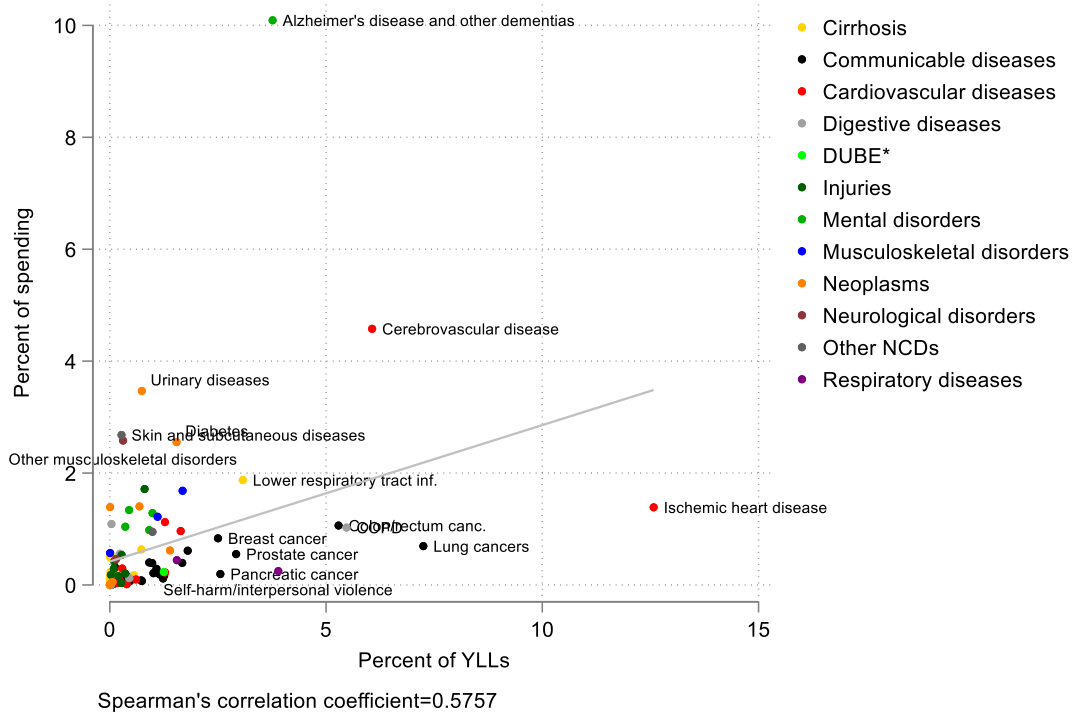

DUBE indicates diabetes, urogenital, blood, and endocrine diseases. Reported in 2019 Norwegian Kroner. Panel A, illustrates health care spending by type of care, sex, and aggregated condition category

### Supplemental Figure 4: Health Care Spending in Norway by Type of Care and Age, 2019

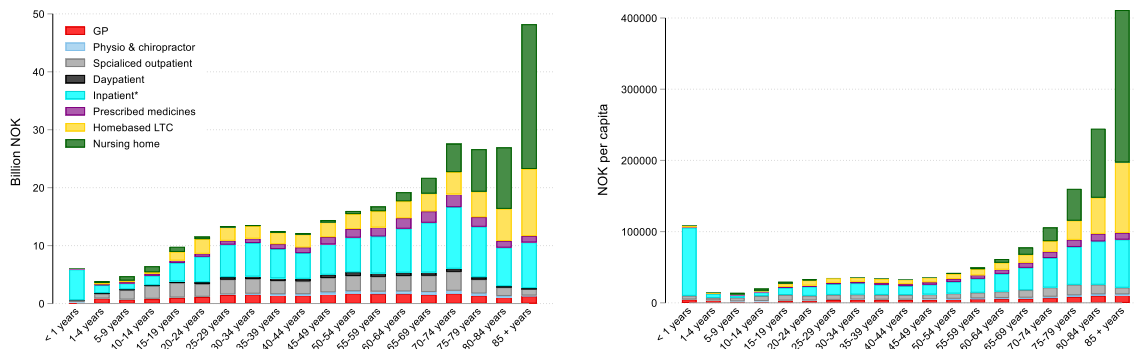

Panel A, illustrates health care spending by type of care and age. Panel B, illustrates health care spending per capita by type of care and age. Increases in spending along the y-axis show more spending.

### Supplemental Figure 5: Top 10 Causes of Spending by Type of Care and Sex, 2019

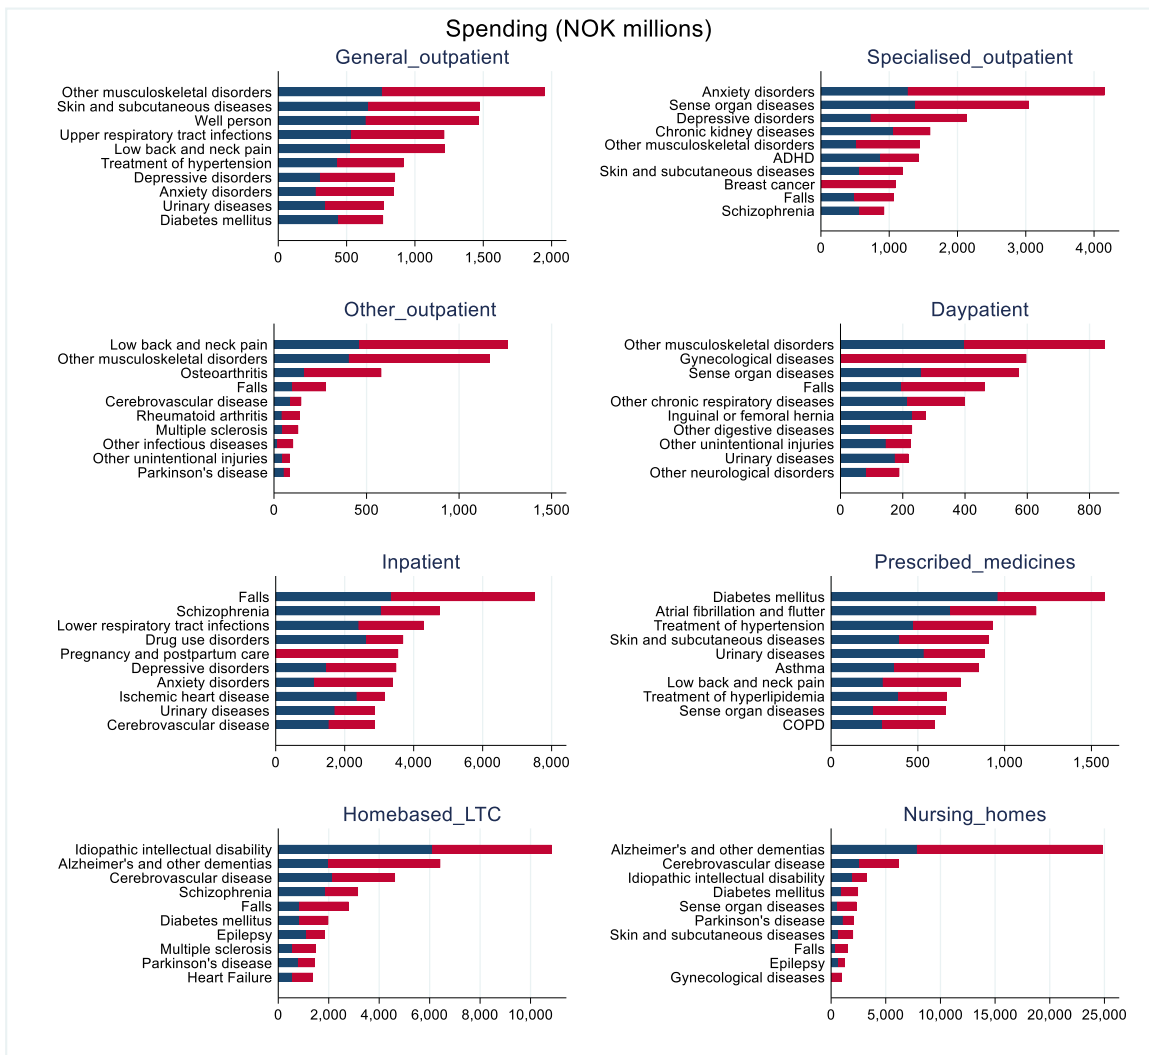

## References

1. The Norwegian Directorate of Health: SAMDATA spesialisthelsetjeneste 2019 [in Norwegian]. The Norwegian Directorate of Health,; 2020.
2. Mjåset C, Byrkjeflot H, Hanssen F, Wynn-Jones W: An introduction to bundled payments. *Tidsskr Nor Laegeforen* 2020, 140(12).
3. Bjørnelv GM, Halsteinli V, Kulseng BE, Sonntag D, Ødegaard RA: Modeling Obesity in Norway (The MOON Study): A Decision-Analytic Approach—Prevalence, Costs, and Years of Life Lost. *Medical Decision Making* 2021, 41(1):21-36.
4. The Norwegian Directorate of Health: Kostnadsnivå og produktivitet i psykisk helsevern og TSB 2014-2018 [in Norwegian]. In. Oslo: The Norwegian Directorate of Health; 2019.
5. Bakken IJ, Ariansen AM, Knudsen GP, Johansen KI, Vollset SE: The Norwegian Patient Registry and the Norwegian Registry for Primary Health Care: Research potential of two nationwide health-care registries. *Scandinavian journal of public health* 2020, 48(1):49-55.
6. The Norwegian Directorate of Health: The KUHR-database [in Norwegian]. In.: The Norwegian Directorate of Health,; 2004.
7. The Norwegian Directorate of Health: Økonomisk evaluering av helsetiltak – en veileder [in Norwegian]. Oslo: The Norwegian Directorate of Health,; 2012.
8. Brathaug AL: Conversation about services included in homebased care in the National Health Accounts; 2021.
9. Dieleman JL, Cao J, Chapin A, Chen C, Li Z, Liu A, Horst C, Kaldjian A, Matyas T, Scott KW: US health care spending by payer and health condition, 1996-2016. *Jama* 2020, 323(9):863-884.
10. Wieser S, Riguzzi M, Pletscher M, Huber CA, Telser H, Schwenkglenks M: How much does the treatment of each major disease cost? A decomposition of Swiss National Health Accounts. *The European Journal of Health Economics* 2018, 19(8):1149-1161.
11. Statistics Norway: National accounts - Health accounts. Statistics Norway; 2021.
12. Rosen AB, Cutler DM: Challenges in building disease-based national health accounts. *Med Care* 2009, 47(7 Suppl 1):S7-13.
13. Sælensminde K, Line T: Samfunnskostnader ved sykdom og ulykker 2015. Helsedirektoratet (IS-2839 Rapport) Hentet fra: <https://www.helsedirektoratet.no/rapporter/samfunnskostnader-ved-sykdom-ogulykker/Samfunnskostnader%20ved%20sykdom%20og%20ulykker> 2019, 2020.
14. Published. WHOJ: International Classification of Primary Care (ICPC-2) Disponible en: <http://www.who.int/classifications/icd/adaptations/icpc2/en>. 2016.
15. World Health Organization: International Classification of Primary Care (ICPC-2) In.: World Health Organization; 2016.
16. Holm SG, Mathisen TA, Sæterstrand TM, Brinchmann BS: Allocation of home care services by municipalities in Norway: a document analysis. *BMC Health Services Research* 2017, 17(1):673.
17. Mueller M, Bourke E, Morgan D: Assessing the comparability of long-term care spending estimates under the Joint Health Accounts questionnaire. Paris: OECD; 2020.
18. Hernæs KH, Brathaug AL: Helseregnskapet – et internasjonalt system. *Økonomiske analyser* 2012, 2(2012):18-23.
19. KOSTRA [<https://www.ssb.no/en/offentlig-sektor/kostra/statistikk/kostra-kommune-stat-rapportering>]
20. Care services [<https://www.ssb.no/en/helse/helsetjenester/statistikk/sjukeheimarheimetenester-og-andre-omsorgstenester>]
